# Supplementary material for: Enhancing and controlling valley magnetic response in MoS2/WS2 heterostructures by all-optical route
Source: PubMed Central journal article supplement (PMC6748949; doi:10.1038/s41467-019-12128-2), 2019-09-17
Supplement: 41467_2019_12128_MOESM1_ESM.pdf [file 41467_2019_12128_MOESM1_ESM.pdf]

# Supplementary Information

## Enhancing and controlling valley magnetic response in MoS<sub>2</sub>/WS<sub>2</sub> heterostructures by all-optical route

Jing Zhang<sup>1†</sup>, LuoJun Du<sup>2,3†</sup>, Shun Feng<sup>1†</sup>, Run-Wu Zhang<sup>4,5</sup>, Bingchen Cao<sup>1</sup>, Chenji Zou<sup>1</sup>, Yu Chen<sup>1</sup>, Mengzhou Liao<sup>2</sup>, Baile Zhang<sup>1</sup>, Shengyuan A. Yang<sup>4</sup>, Guangyu Zhang<sup>2,6\*</sup> and Ting Yu<sup>1\*</sup>

1. *Division of Physics and Applied Physics, School of Physical and Mathematical Sciences, Nanyang Technological University, Singapore 63737, Singapore*
2. *CAS Key Laboratory of Nanoscale Physics and Devices, Institute of Physics, Chinese Academy of Sciences, Beijing, 100190, China*
3. *Department of Electronics and Nanoengineering, Aalto University, Tietotie 3, FI-02150, Finland*
4. *Research Laboratory for Quantum Materials, Singapore University of Technology and Design, Singapore 487372, Singapore*
5. *Key Lab of advanced optoelectronic quantum architecture and measurement (MOE), Beijing Key Lab of Nanophotonics & ultrafine Optoelectronic Systems, and School of Physics, Beijing Institute of Technology, Beijing 100081, China*
6. *Songshan Lake Materials Laboratory, Dongguan, Guangdong 523808, China*

† These authors contribute equally to this work.

Corresponding authors: gyzhang@iphy.ac.cn, yuting@ntu.edu.sg

## Supplementary Discussion

**Calculations of required electron density to lift Fermi level to cross spin-polarized upper conduction band.** For the conduction band of MoS<sub>2</sub>, the dispersion relation is as follows:

$$E = E_c + \frac{\hbar^2}{2m^*} (k_x^2 + k_y^2) \quad (1)$$

where  $m^*$  is the effective mass and 0.4 times the free electron mass.

Using the periodic boundary conditions, quantized values  $k_x$  and  $k_y$  are:

$$k_x = n_x \frac{2\pi}{L_x} \quad k_y = n_y \frac{2\pi}{L_y} \quad (2)$$

where  $L_x$  and  $L_y$  are the dimensions of the sample,  $n_x$  and  $n_y$  are integers.

Therefore, the area in the  $k_x$ - $k_y$  plane 'occupied' by an individual state is given by:

$$\frac{2\pi}{L_x} \times \frac{2\pi}{L_y} = \frac{4\pi^2}{L_x \times L_y} \quad (3)$$

The total number of states  $N_T(E)$  for the area enclosed by the circle  $\pi k^2$ :

$$N_T(E) = \frac{\pi k^2}{\frac{4\pi^2}{L_x \times L_y}} = \frac{k^2 (L_x \times L_y)}{4\pi} \quad (4)$$

The density of states per unit area per unit energy is given by:

$$N(E) = \frac{1}{L_x \times L_y} \frac{dN_T(E)}{dE} = \frac{m}{2\pi\hbar^2} \quad (5)$$

For MoS<sub>2</sub>, the spin-splitting for the conduction band  $\Delta_{cB}$  is 3 meV.

Thus, corresponding electron density, that is required to dope electrons into the upper conduction band, is:

$$n = N(E) \times \Delta_{cB} = 2.5 \times 10^{11} / \text{cm}^2 \quad (6)$$

We also calculated the electronic band structures for monolayer MoS<sub>2</sub> and WS<sub>2</sub> (with SOC included), as shown in Supplementary Figure 1. It can be observed that the SOC effect causes the spin splitting of both VBM and CBM level at the K-symmetry point, while energy splitting for valence band is much larger than that of conduction band for both MoS<sub>2</sub> and WS<sub>2</sub>. Supplementary Figure 1b and Supplementary Figure 1d are magnified energy splitting of the CBM at K point, which can be determined to be 3 meV and 30 meV for monolayer MoS<sub>2</sub> and WS<sub>2</sub>, respectively.

## Supplementary Figures

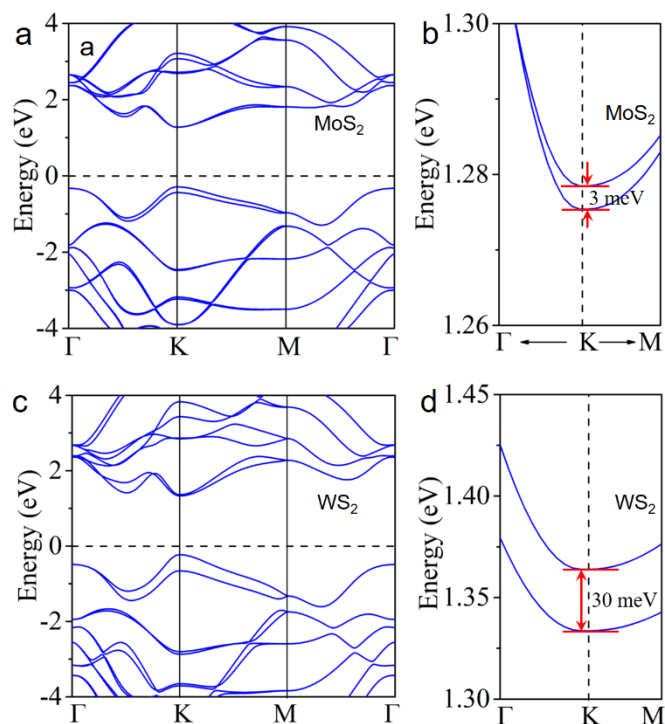

Supplementary Figure 1. (a) Band structure of monolayer MoS<sub>2</sub>. (b) Magnified energy splitting of the MoS<sub>2</sub> CBM at K point. (c) Band structure of monolayer WS<sub>2</sub>. (d) Magnified energy splitting of the WS<sub>2</sub> CBM at K point.

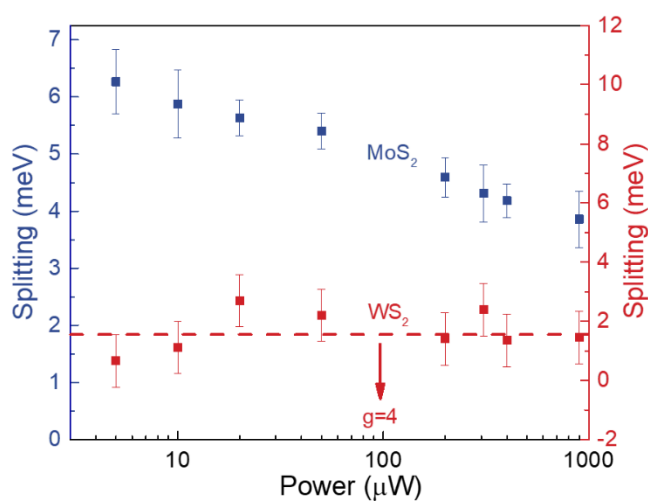

Supplementary Figure 2. Excitation power dependence of the valley Zeeman splitting energy for MoS<sub>2</sub> and WS<sub>2</sub>. The error bars are from the fitting uncertainties of the PL peak energies. The splitting value of MoS<sub>2</sub> (WS<sub>2</sub>) corresponds to left blue (right red) Y-axis.

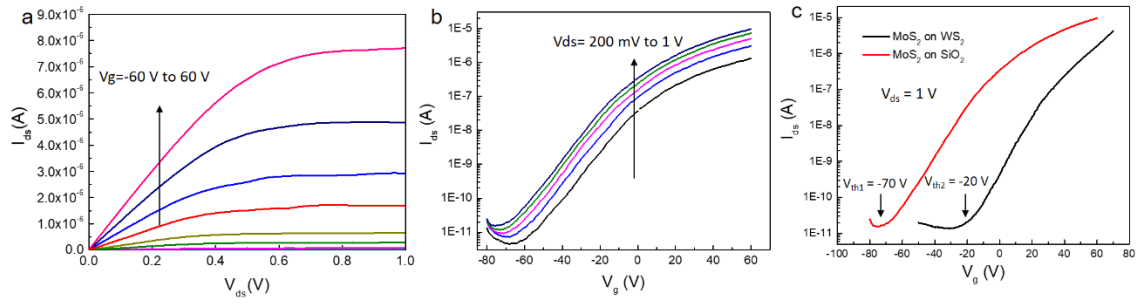

Supplementary Figure 3. (a) Typical output curves for MoS<sub>2</sub> devices on WS<sub>2</sub> with gate voltage ( $V_g$ ) sweeping from -60 V to 60 V. (b) Typical transfer curves for MoS<sub>2</sub> devices on WS<sub>2</sub> with source-drain voltage ( $V_{ds}$ ) from 200 mV to 1 V. (c) Transfer curve comparison for MoS<sub>2</sub> devices on WS<sub>2</sub> and SiO<sub>2</sub>, respectively.

We have fabricated back-gated field effect transistors based on single-crystalline MoS<sub>2</sub> domains on WS<sub>2</sub> and Si/SiO<sub>2</sub> substrates. Supplementary Figure 3a and 3b are output and transfer curves of a typical MoS<sub>2</sub> device on WS<sub>2</sub>, showing a typical *n*-type transistor behavior with threshold voltage located at around -70 V. We calculated the electron mobility of MoS<sub>2</sub> FET device based on the standard transistor model. The resulted mobility and on/off current ratio at room temperature are ~40 cm<sup>2</sup>/Vs and 10<sup>6</sup>, respectively. We also compared the transfer curves of MoS<sub>2</sub> domains on WS<sub>2</sub> and SiO<sub>2</sub> in Supplementary Figure 3c. It can be clearly observed that the threshold voltage shifting from -20 V on the SiO<sub>2</sub> to -70 V on WS<sub>2</sub> domains. As is known, the position of threshold voltage reflects the doping level of device, which may come from (1) the intrinsic *n* doping from the sulfur vacancies; (2) the doping introduced by surface contaminations during device fabrication process; or (3) the doping induced by the underneath WS<sub>2</sub>. Due to the same growth conditions and device micro-fabrication processes, (1) and (2) should not change dramatically. The shift of threshold voltage and enhanced electron doping can be attributed to the electron transfer from WS<sub>2</sub> to MoS<sub>2</sub>, which is consistent with our optical results in the manuscript.

Here, we can roughly estimate the electron doping density based on parallel-plate capacitor model:  $n_{2D} = C_{ox} \Delta V_{bg} / e$ ; where  $C_{ox} = \epsilon_0 \epsilon_r / d_{ox}$ ,  $\epsilon_0 = 8.85 \times 10^{-12} \text{ Fm}^{-1}$ ,  $\epsilon_r = 3.9$ ,  $e = 1.6 \times 10^{-19} \text{ C}$ . The charge transfer between WS<sub>2</sub> and MoS<sub>2</sub> makes

prominent contributions to the threshold voltage shift  $\Delta V_{bg} = |V_{th1} - V_{th2}| = 50V$ , giving typical  $n$  doping concentration variation of  $\Delta n_{2D} = 3.6 \times 10^{12} \text{ cm}^{-2}$  which is larger than the required electron doping density required to dope electrons into the upper conduction band. Therefore, the Fermi level of MoS<sub>2</sub> in MoS<sub>2</sub>/WS<sub>2</sub> heterostructures is basically located in the spin-split upper conduction band.

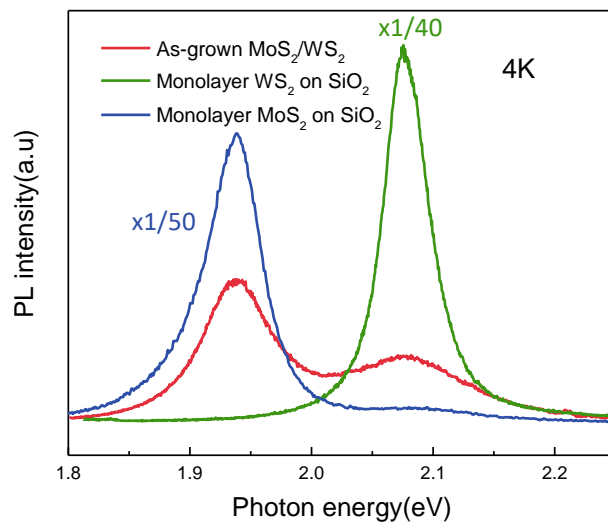

Supplementary Figure 4. PL spectra for monolayer WS<sub>2</sub>, MoS<sub>2</sub> and MoS<sub>2</sub>/WS<sub>2</sub> heterostructures at 4.2K.

Supplementary Figure 4 shows the PL spectra for monolayer MoS<sub>2</sub>, WS<sub>2</sub> and heterostructures at 4.2 K. Despite the energy difference of excitons, the PL spectra at 4.2 K are in good harmony with that at room temperature. Due to ultrafast interlayer charge transfer, PL intensity in heterostructures is quenched by a factor of 50 (40) compared with MoS<sub>2</sub> (WS<sub>2</sub>).

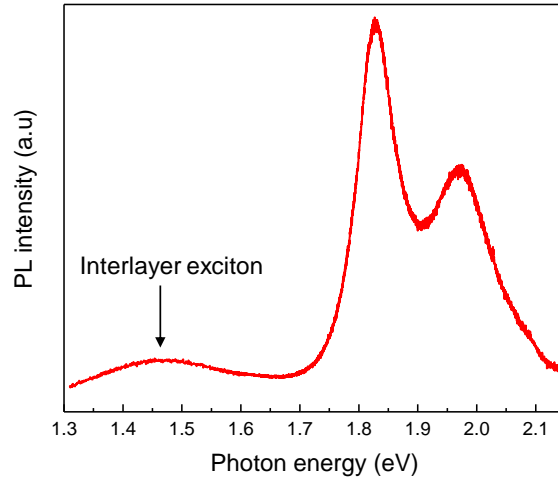

Supplementary Figure 5. PL spectra for as-grown MoS<sub>2</sub>/WS<sub>2</sub> heterostructures at room temperature.

Supplementary Figure 5 shows the PL spectrum of MoS<sub>2</sub>/WS<sub>2</sub> heterostructures at room temperature with a large energy range. In addition to the intralayer excitons at high energy regime, we can also observe a broad peak located at 1.45 eV. This new low energy peak shows good agreement with interlayer exciton obtained via theoretical calculation (Fig. 2c in the main text).

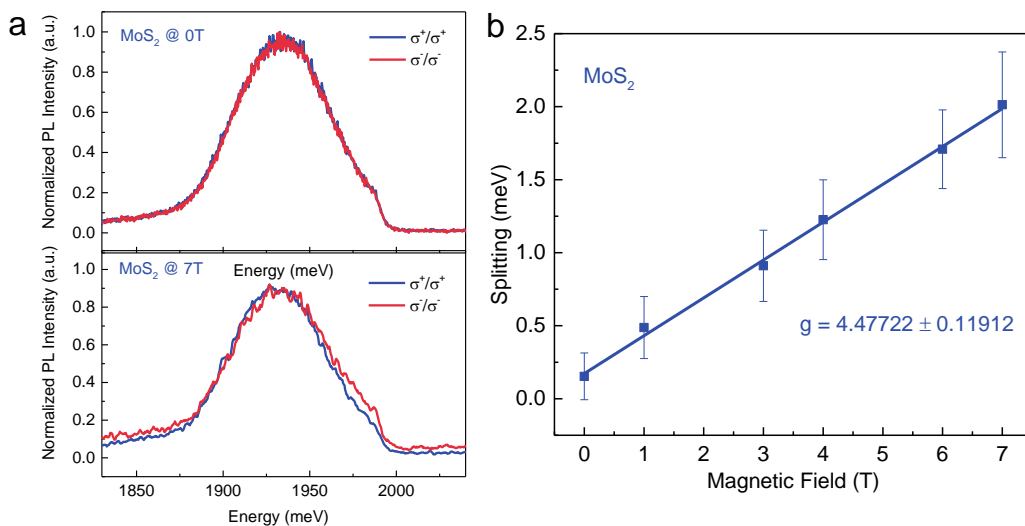

Supplementary Figure 6. Valley Zeeman splitting for isolated monolayer MoS<sub>2</sub> at 4.2 K. (a) Circularly polarized PL for isolated monolayer MoS<sub>2</sub> flake under magnetic of 0 T (top) and 7 T (bottom). (b) Linear fitting of splitting energy as a function of magnetic field to extract g factor.

Supplementary Figure 6a shows the circularly polarized PL for isolated monolayer MoS<sub>2</sub> flake with out-of-plane magnetic field of 0 T (top panel) and 7 T (bottom panel), respectively. There is no obvious energy shift for right-circularly ( $\sigma^+$ , blue curve) and left-circularly ( $\sigma^-$ , red curve) polarized light excitation without magnetic field. The valley Zeeman splitting can be clearly observed from  $\sigma^+$  and  $\sigma^-$  polarized emission at 7 T. Valley splitting energy as a function of magnetic field is plotted in Supplementary Figure 6b. The extracted g factor can be determined to be around  $4.47 \pm 0.12$  by linear fitting. This result is closely in line with previous reports of undoped TMDs, which can be understood in non-interacting regime.
